# Supplementary material
Source: publisher site journal article supplement (https://www.dovepress.com/article/321480)
Supplement: Supplementary file 1 [file get_supplementary_file.php]

Supporting Information

Neutral non-enzymatic glucose biosensors based on an electrochemically deposited Pt/Au nano-alloy electrode

1. **Non-enzymatic glucose detection in neutral environment (PBS, pH 7.4) of different electrode materials**

**Figure S1**. Catalytic capability of glucose oxidation of various electrodes in neutral environment. (A) Au electrode; (B) Pt electrode; (C) Pt/Au nano-alloy electrode; (D) Stability of the Pt/Au nano-alloy electrode as measured by 200 repetitive potential sweeps at a scan rate of 100 mV/s in 5 mM [Fe(CN)6]3-/4- in PBS.

**2. Material characterization of the as-fabricated Pt/Au nano alloy after 90 d stored at room temperature and long cycling tests**

**Figure S2.** Material characterization of the as-fabricated Pt/Au nano alloy after 90 d stored at room temperature and long cycling tests. (A) XPS spectra of the as-fabricated Pt/Au nano alloy; (B) and (C) XPS spectra of the Pt and Au in the as-fabricated Pt/Au nano-alloy, respectively.

**3. Long-term stability test**

**Figure S3.** Non-enzymatic glucose detectionin 0.1 M PBS (pH 7.4) solution using electrodes store in room temperature for 90 d.
